# Supplementary material for: Synergistic elimination of antibiotic resistance genes and tetracycline antibiotics in wastewater via a Z-scheme Bi2WO6/g-C3N4 heterojunction: degradation pathways and mechanism
Source: Royal Society of Chemistry journal article supplement (doi:10.1039/d5ra09524g), 2026-03-25
Supplement: d5ra09524g1.pdf [file d5ra09524g1.pdf]

**Supplementary Information for**  
**Synergistic elimination of antibiotic resistance**  
**genes and tetracycline antibiotics in wastewater**  
**via a Z-scheme Bi<sub>2</sub>WO<sub>6</sub>/g-C<sub>3</sub>N<sub>4</sub> heterojunction:**  
**Degradation pathways and mechanism**

Yuankun Liu<sup>a\*</sup>, Gangyi Sun<sup>a</sup>, Yuanqi Cao<sup>a</sup>, Xing Li<sup>a</sup>, Zhangya Li<sup>a</sup>, Zhonglin Chen<sup>b\*</sup>

<sup>a</sup> College of Architecture and Civil Engineering, Beijing University of  
Technology, Beijing 100124, P.R. China

<sup>b</sup> State Key Laboratory of Urban-rural Water Resources and  
Environment, Harbin Institute of Technology, Harbin 150090, P. R.  
China

**\*Corresponding author:**

**E-mail:** liuyuankun@bjut.edu.cn (Yuankun Liu)

## **Supplementary data**

**Text S1.** Main experimental materials

**Text S2.** Preparation of g-C<sub>3</sub>N<sub>4</sub>

**Text S3.** Preliminary optimization experiments

**Text S4.** Characterization

**Figure S1.**(a) Bi<sub>2</sub>WO<sub>6</sub>/g-C<sub>3</sub>N<sub>4</sub> photocatalytic oxidation removal rates at different mass ratios, (b) at different pH values, and (c) at different calcination temperatures

**Figure S2.** Effects of (a) Cl<sup>-</sup>, (b) SO<sub>4</sub><sup>2-</sup>, (c) HCO<sub>3</sub><sup>-</sup> and (d) HA on the photocatalytic degradation of TC by Bi<sub>2</sub>WO<sub>6</sub>/g-C<sub>3</sub>N<sub>4</sub>.

**Figure S3.** X-ray Photoelectron (a) Survey, (b) C1s, (c) N1s, (d) O1s, (e) Bi4f and (f) W4f spectrum of Used-Bi<sub>2</sub>WO<sub>6</sub>/g-C<sub>3</sub>N<sub>4</sub>

**Figure S4.** Photocatalytic degradation of (a) TC, (b) CTC and (c) OTC in deionized water, tap water and lake water.

**Figure S5.** Liquid chromatogram of photocatalytic oxidation of TC.

**Figure S6.** Liquid-phase mass spectra of photocatalytic oxidation of TC in ESI+ mode.

**Figure S7.** Liquid-phase mass spectra of photocatalytic oxidation of TC in ESI- mode.

**Table S1.** Main water quality indicators of the real water.

**Table S2.** The qPCR reaction system.

**Table S3.** Upstream and downstream primers.

**Table S4.** qPCR reaction procedure.

**Table S5.** The physical and chemical parameters of photocatalytic materials.

**Table S6.** The proposed first-order kinetic parameters of different photocatalytic materials.

**Table S7.** Comparison of catalyst stability during degradation between Bi<sub>2</sub>WO<sub>6</sub>/g-C<sub>3</sub>N<sub>4</sub> and previously reported photocatalysts.

**Table S8.** Chemical formulas and main fragments (m/z) of intermediate products.

### **Text S1.** Main experimental materials

Melamine (99.0% purity,  $C_3H_6N_6$ ), bismuth nitrate pentahydrate (99.0% purity,  $BiN_3O_9 \cdot 5H_2O$ ), disodium ethylenediaminetetraacetate (99.0% purity, EDTA-2Na), aureomycin hydrochloride ( $C_{22}H_{23}ClN_2O_8 \cdot HCl$ ), isopropyl alcohol (IPA), anhydrous ethanol (99.7% purity), sodium chloride (99.5% purity, NaCl), sodium bicarbonate (99.8% purity,  $NaHCO_3$ ) and sodium sulfate (99.0% purity,  $Na_2SO_4$ ) were purchased from Aladdin Industries (Shanghai, China). 5,5-Dimethyl-1-pyrroline-N-oxide (97.0% purity, DMPO) was purchased from Sigma, USA. Sodium tungstate dihydrate (98.0% purity,  $H_4Na_2O_6W$ ) and hexadecyltrimethylammonium bromide (98.0% purity, CTAB) were procured from Bide Pharmaceuticals Ltd (Shanghai, China). Tetracycline (98.0% purity,  $C_{22}H_{24}N_2O_8$ , Myriad, Beijing), oxytetracycline hydrochloride (95.0% purity,  $C_{22}H_{24}N_2O_9 \cdot HCl$ , Maclean's, Shanghai) and azoxypiperidinol (98.0% purity, Tempol, Leyan) were also used. All the remaining reagents were of analytical-grade quality and procured from the Beijing Chemical Plant (Beijing, China). All reagents were employed without undergoing further purification. Ultrapure water was used for the preparation of all aqueous solutions. (Milli-Q A10, Millica, MA, USA). The water from Longtan Lake (Beijing, China) was collected to simulate the actual water quality, filtered through a 0.45  $\mu m$  membrane, and then stored in a refrigerator at 4° C.

**Text S2.** Preparation of g-C<sub>3</sub>N<sub>4</sub>

The g-C<sub>3</sub>N<sub>4</sub> was fabricated in accordance with the previously documented method[1].

A specific quantity of melamine was weighed and then positioned within a tube furnace. It was heated up to 520 °C with a heating rate of 2.3 °C/min and kept for 4 h.

After cooling to room temperature, the resulting g-C<sub>3</sub>N<sub>4</sub> was ground into powder for later use. The first calcination product was then subjected to a second calcination in the tube furnace. The heating rate was set to 5 °C/min, and the temperature was raised to 500 °C and maintained for 2 h. After cooling to room temperature and thorough grinding, a light-yellow g-C<sub>3</sub>N<sub>4</sub> sample was obtained.

### **Text S3.** Preliminary optimization experiments

Preliminary experiments were conducted to optimize the synthesis parameters of the  $\text{Bi}_2\text{WO}_6/\text{g-C}_3\text{N}_4$  composite. As shown in Fig S1, the photocatalytic performance was significantly influenced by the  $\text{Bi}_2\text{WO}_6$  loading, precursor solution pH, and calcination temperature (TC = 20 mg/L, catalyst dosage = 0.2 g/L). The optimal photocatalytic activity was obtained at a  $\text{Bi}_2\text{WO}_6$  content of 15 wt%, which can be attributed to the formation of sufficient heterojunction interfaces, while excessive loading caused particle agglomeration and reduced active sites. The precursor solution pH also affected the nucleation and growth of  $\text{Bi}_2\text{WO}_6$ , and the sample prepared at pH 3 exhibited enhanced activity due to more uniform crystal growth. In addition, the calcination temperature played an important role in determining the crystallinity and surface properties of the composite, with 160 °C identified as the optimal temperature. Under these conditions, the TC removal efficiency reached 81.80%. Therefore, a  $\text{Bi}_2\text{WO}_6/\text{g-C}_3\text{N}_4$  mass ratio of 15 wt%, synthesis pH of 3, and calcination temperature of 160 °C were selected for subsequent experiments.

#### **Text S4. Characterization**

The morphological characteristics and microstructure of the samples were observed by means of scanning electron microscopy (SEM, Hitachi SU9000) as well as field emission transmission electron microscopy (TEM, JEOLJEM 2100F, accelerating voltage 200 kV). The crystal structure and material composition of the samples were analyzed using X-ray diffraction (XRD, D8 ADVANCE, Bruker, Germany). The specific surface area and pore size distribution characteristics of the materials were determined using a physisorption instrument (ASAP 2460, Mack Corporation, USA). A UV-visible-NIR spectrophotometer (UV-vis DRS, UV3600, Shimadzu, Japan) was employed to record the UV-visible diffuse reflectance spectra of the samples. X-ray photoelectron spectrometry (XPS, Thermo ESCALAB 250Xi, Thermo Fisher, USA) was utilized to analyze the surface elemental composition and valence band structure of the samples. The functional groups on the sample surface were determined by Fourier infrared spectrometry (FT-IR, Thermo NICOLET6700). A fluorescence spectrometer (FLS1000/FS5, Edinburgh, UK) was employed to analyze the electron migration and complexation processes of the samples.

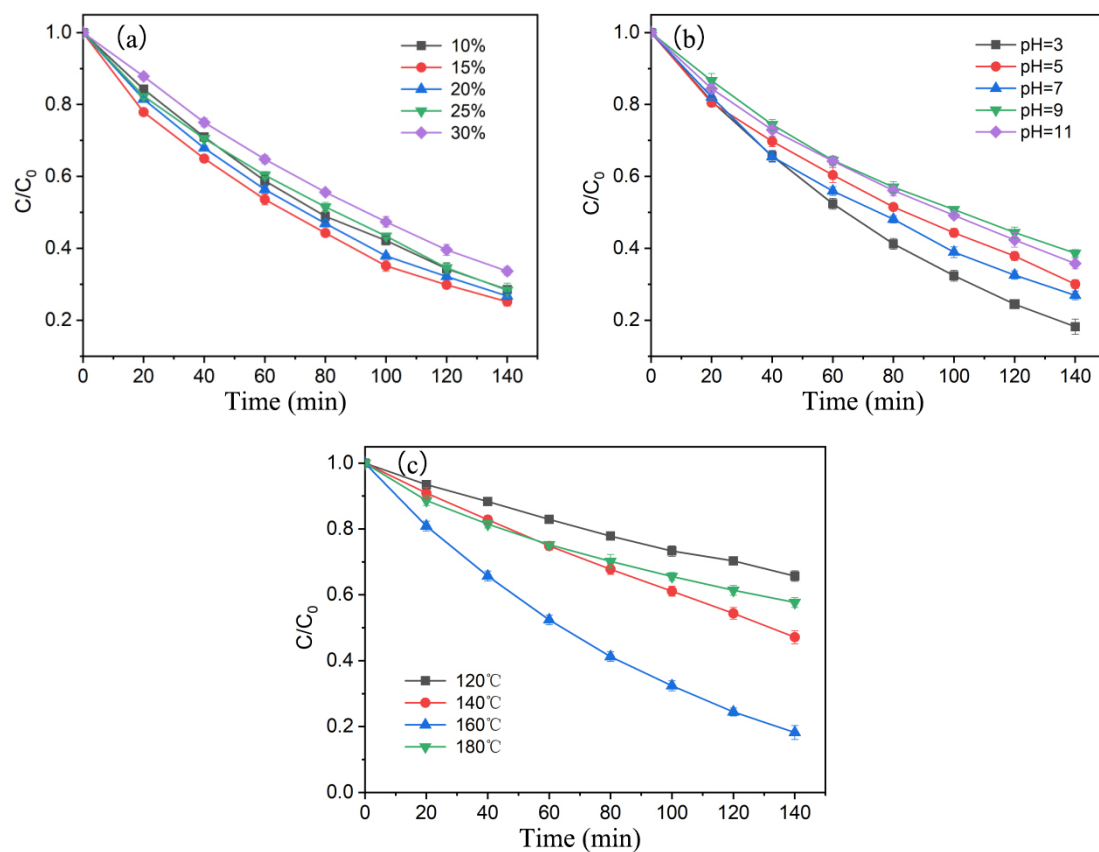

**Figure S1.**(a)  $\text{Bi}_2\text{WO}_6/\text{g-C}_3\text{N}_4$  photocatalytic oxidation removal rates at different mass ratios, (b) at different pH values, and (c) at different calcination temperatures

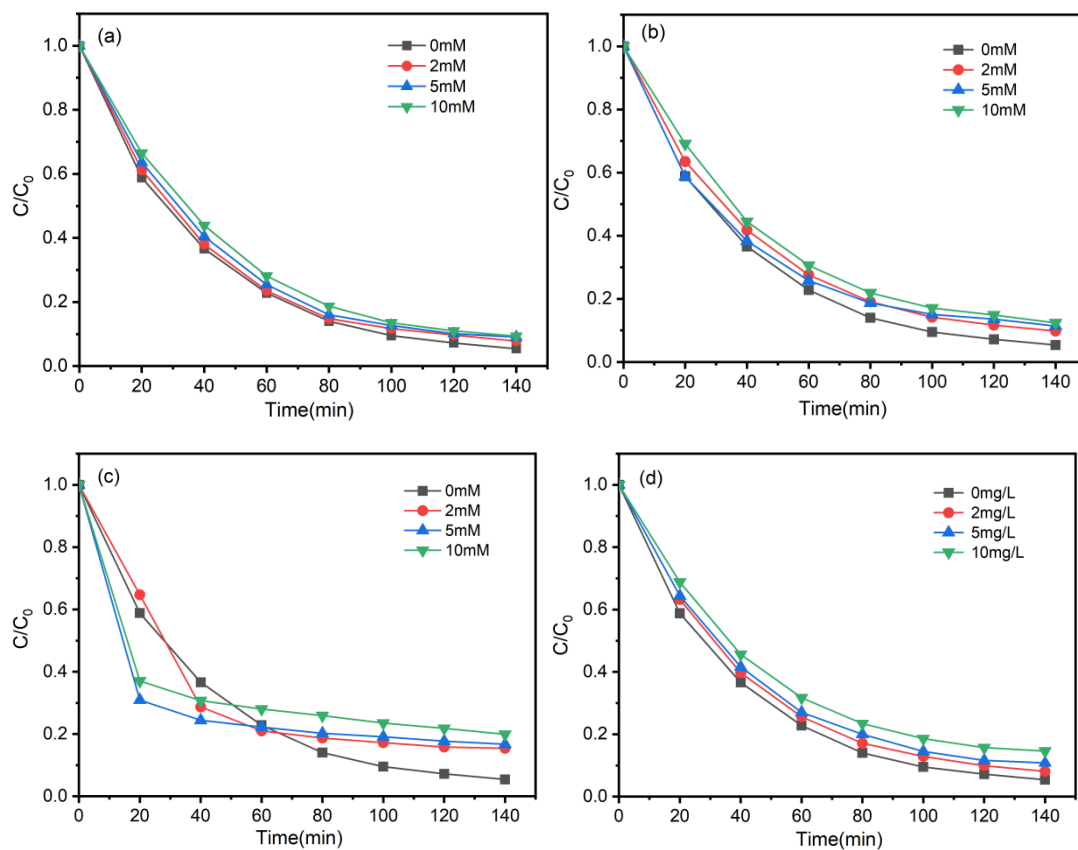

**Figure S2.** Effects of (a)  $\text{Cl}^-$ , (b)  $\text{SO}_4^{2-}$ , (c)  $\text{HCO}_3^-$  and (d) HA on the photocatalytic degradation of TC by  $\text{Bi}_2\text{WO}_6/\text{g-C}_3\text{N}_4$ .

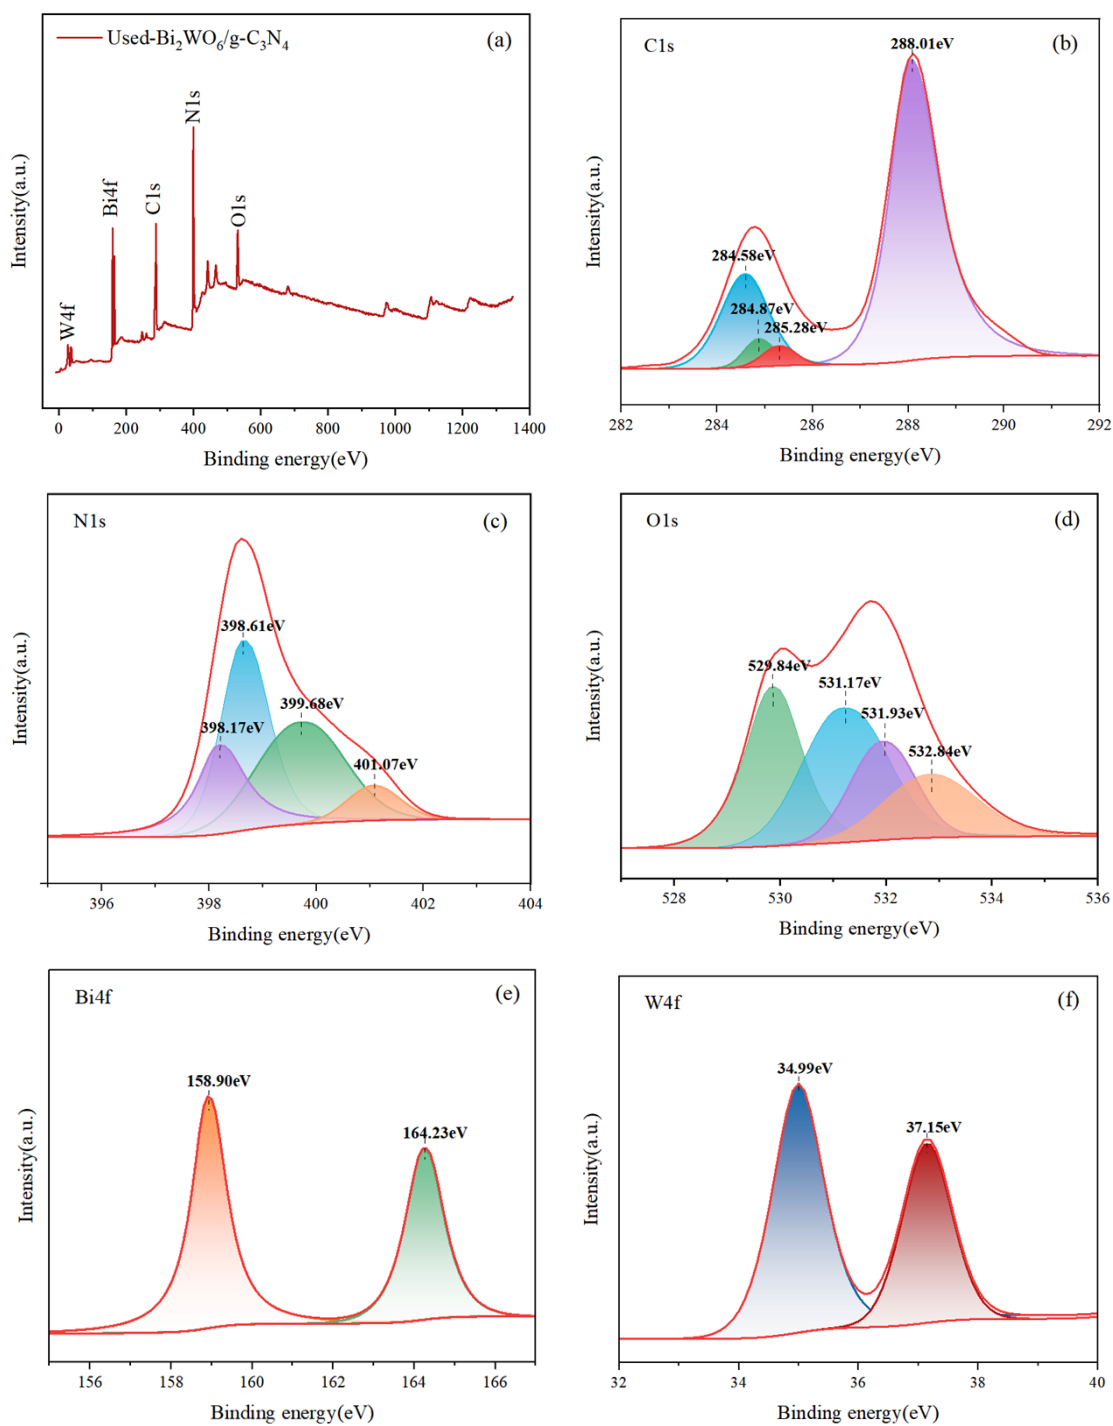

**Figure S3.** X-ray Photoelectron (a) Survey, (b) C1s, (c) N1s, (d) O1s, (e) Bi4f and (f)

W4f spectrum of Used-Bi<sub>2</sub>WO<sub>6</sub>/g-C<sub>3</sub>N<sub>4</sub>

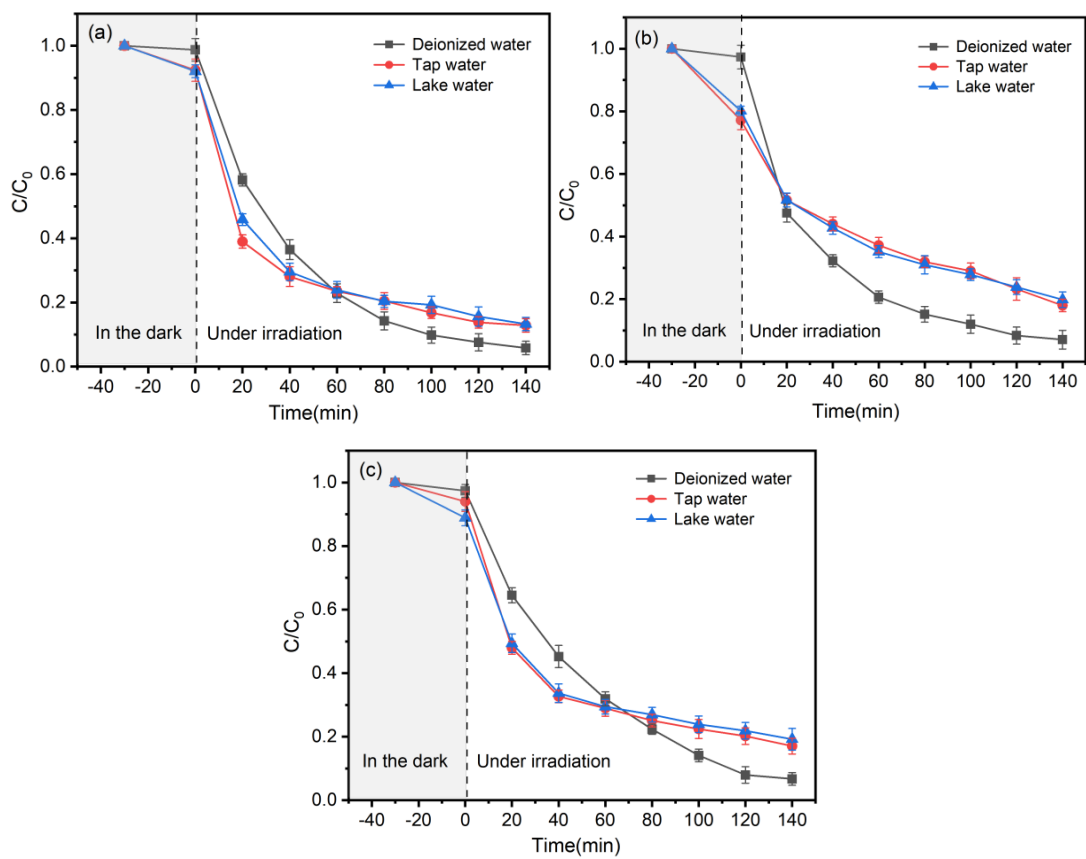

**Figure S4.** Photocatalytic degradation of (a) TC, (b) CTC and (c) OTC in deionized water, tap water and lake water.

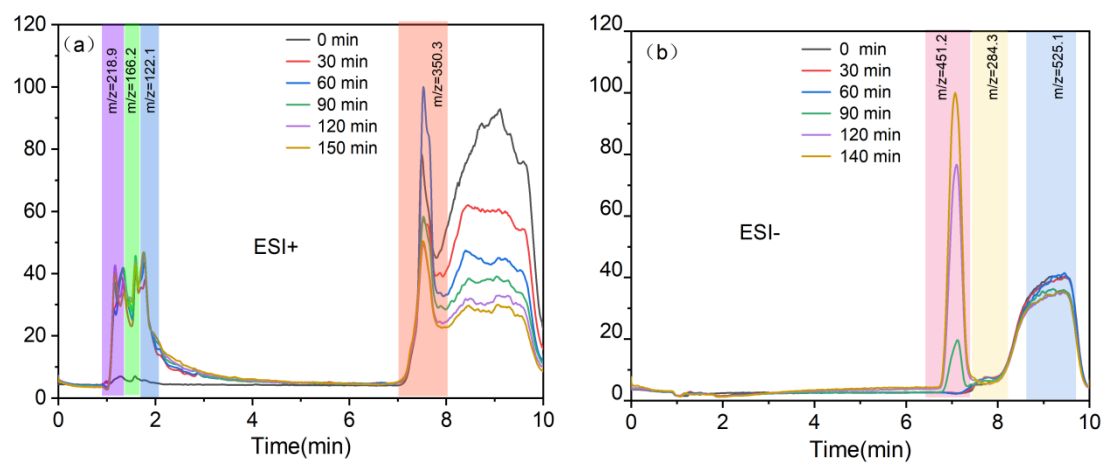

**Figure S5.** Liquid chromatogram of photocatalytic oxidation of TC.

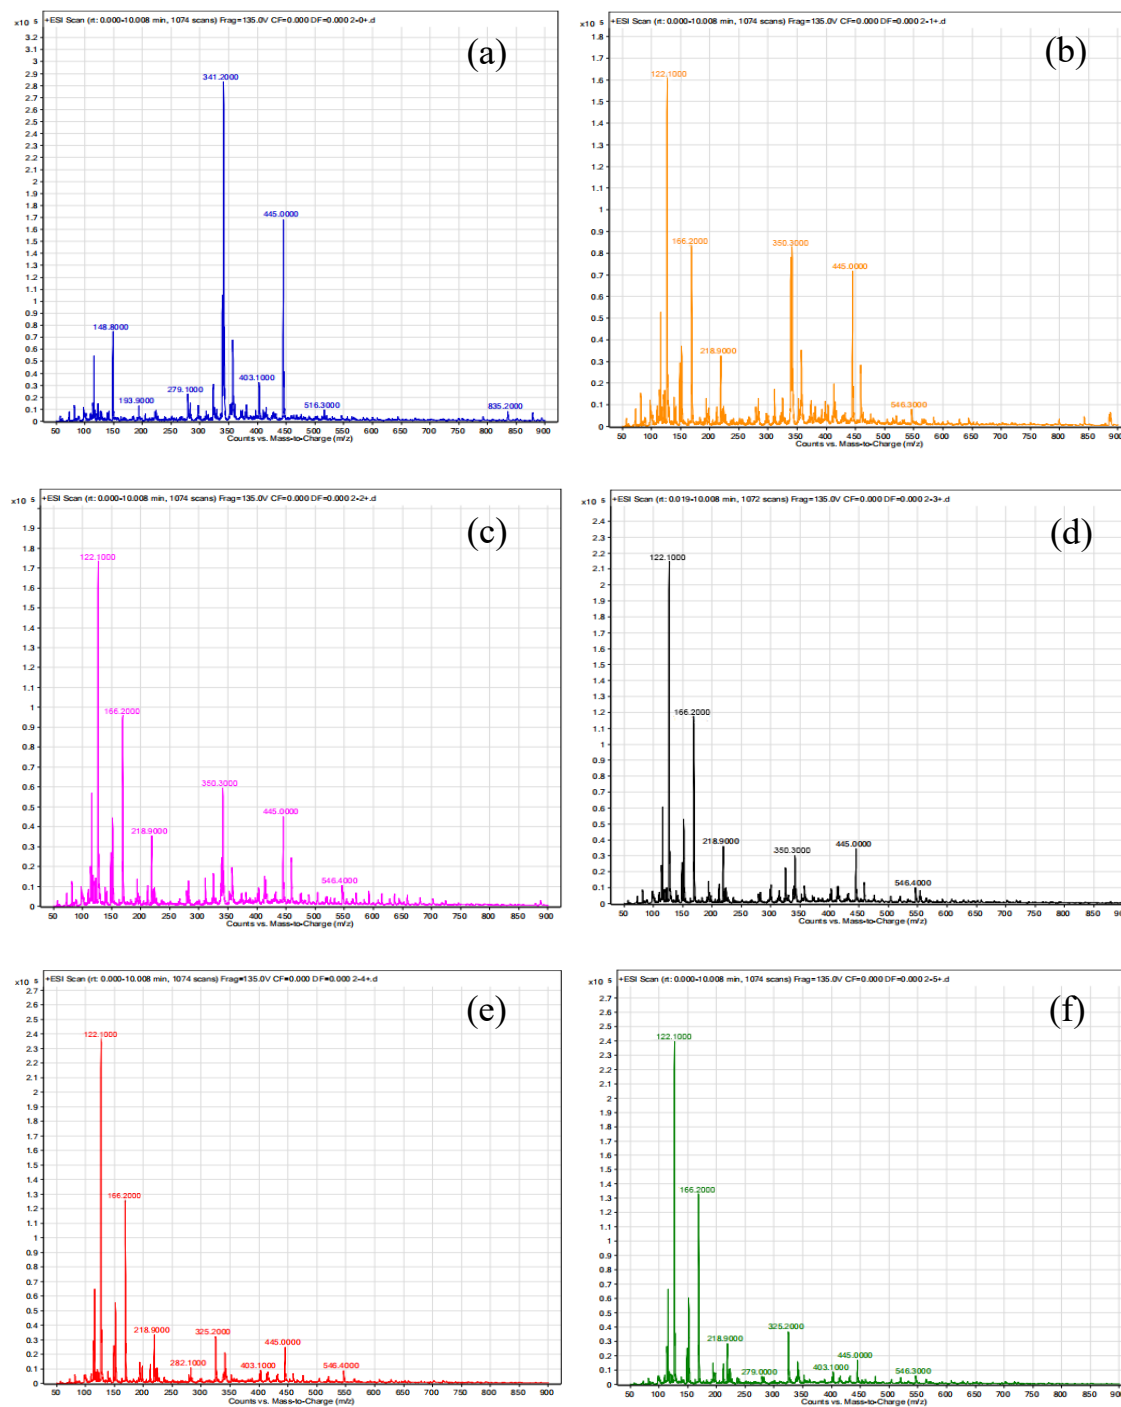

**Figure S6.** Liquid-phase mass spectra of photocatalytic oxidation of TC in ESI+

mode.

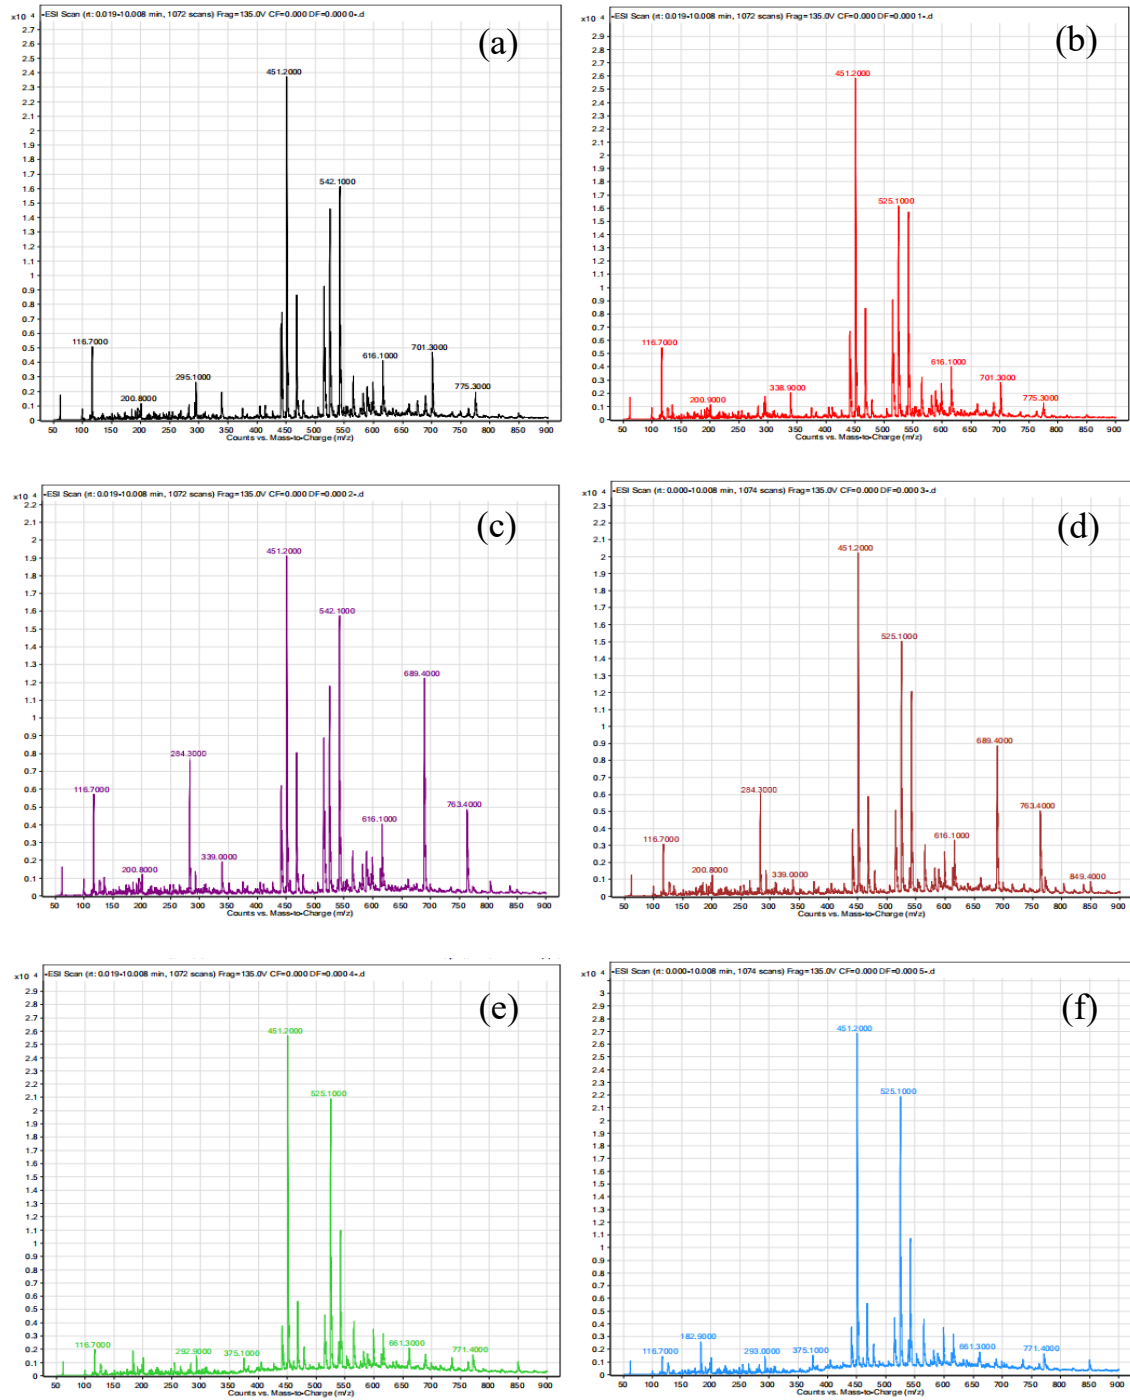

**Figure S7.** Liquid-phase mass spectra of photocatalytic oxidation of TC in ESI-mode.

**Table S1.** Main water quality indicators of the real water.

| <b>Parameter</b>                      | <b>Tap water</b> | <b>Lake water</b> |
|---------------------------------------|------------------|-------------------|
| pH                                    | 7.15 ± 0.20      | 7.20 ± 0.20       |
| Turbidity (NTU)                       | 0.405 ± 0.08     | 1.055 ± 0.05      |
| DOC (mg L <sup>-1</sup> )             | 1.171 ± 0.20     | 2.515 ± 0.40      |
| UV <sub>254</sub> (cm <sup>-1</sup> ) | 0.0200 ± 0.004   | 0.0587 ± 0.007    |

**Table S2.** The qPCR reaction system.

| <b>Components</b>                     | <b>Volume (<math>\mu\text{L}</math>)</b> |
|---------------------------------------|------------------------------------------|
| 1×LightCycler 480 SYBR Gree I Master  | 10                                       |
| PCR Forwad primer(10 $\mu\text{M}$ )  | 1                                        |
| PCR Reverse primer(10 $\mu\text{M}$ ) | 1                                        |
| DNA template                          | 2                                        |
| ddH <sub>2</sub> O                    | 6                                        |
| Total Volume                          | 20                                       |

**Table S3.** Upstream and downstream primers.

| Target genes | Primer | Sequence                  | Amplified        | Annealing          |
|--------------|--------|---------------------------|------------------|--------------------|
|              |        |                           | fragments<br>/bp | temperature<br>/°C |
| <i>tet A</i> | F      | CTCACCAGCCTGACCTCGAT      | 210              | 61                 |
|              | R      | CACGTTGTTATAGAAGCCGCATAG  |                  |                    |
| <i>tet C</i> | F      | ACTGGTAAGGTAAACGCCATTGTC  | 418              | 68                 |
|              | R      | ATGCATAAACCAGCCATTGAGTAAG |                  |                    |
| <i>sulI</i>  | F      | GCCGATGAGATCAGACGTATTG    | 162              | 60                 |
|              | R      | CGCATAGCGCTGGGTTTC        |                  |                    |
| <i>sulII</i> | F      | TCATCTGCCAAACTCGTCGTTA    | 191              | 59                 |
|              | R      | GTCAAAGAACGCCGCAATGT      |                  |                    |
| <i>intII</i> | F      | GCCTTGATGTTACCCGAGAG      | 280              | 60                 |
|              | R      | GATCGGTCGAATGCGTGT        |                  |                    |
| <i>16S</i>   | F      | GGGTTGCGCTCGTTGC          | 193              | 55                 |
| <i>rRNA</i>  | R      | ATGGYTGTCGTCAGCTCGTG      |                  |                    |

**Table S4.** qPCR reaction procedure.

| <b>Procedure</b> | <b>Temperature(°C)</b> | <b>Time</b> | <b>Remark</b>                                 |
|------------------|------------------------|-------------|-----------------------------------------------|
| Pre-denaturation | 95                     | 10 min      |                                               |
| Denaturation     | 95                     | 30 s        | Denaturation to extension 40 cycles in total. |
| Annealing        | 60                     | 30 s        |                                               |
| Extension        | 72                     | 30 s        |                                               |

**Table S5.** The physical and chemical parameters of photocatalytic materials.

| <b>Samples</b>                                                   | <b>S<sub>BET</sub>(m<sup>2</sup>/g)</b> | <b>Average Pore diameter(nm)</b> | <b>Pore Volume(cm<sup>3</sup>/g)</b> |
|------------------------------------------------------------------|-----------------------------------------|----------------------------------|--------------------------------------|
| g-C <sub>3</sub> N <sub>4</sub>                                  | 8.052                                   | 22.034                           | 0.044                                |
| Bi <sub>2</sub> WO <sub>6</sub> /g-C <sub>3</sub> N <sub>4</sub> | 46.430                                  | 13.083                           | 0.152                                |

**Table S6.** The proposed first-order kinetic parameters of different photocatalytic materials.

| Catalyst types                                                   | TC      |                | CTC     |                | OTC     |                |
|------------------------------------------------------------------|---------|----------------|---------|----------------|---------|----------------|
|                                                                  | K       | R <sup>2</sup> | K       | R <sup>2</sup> | K       | R <sup>2</sup> |
| g-C <sub>3</sub> N <sub>4</sub>                                  | 0.00808 | 0.9929         | 0.01009 | 0.9975         | 0.00299 | 0.9779         |
| Bi <sub>2</sub> WO <sub>6</sub>                                  | 0.00533 | 0.9993         | 0.00924 | 0.9266         | 0.00909 | 0.9973         |
| Bi <sub>2</sub> WO <sub>6</sub> /g-C <sub>3</sub> N <sub>4</sub> | 0.02047 | 0.9853         | 0.01784 | 0.9668         | 0.0197  | 0.9928         |

**Table S7.** Comparison of catalyst stability during degradation between Bi<sub>2</sub>WO<sub>6</sub>/g-C<sub>3</sub>N<sub>4</sub> and previously reported photocatalysts.

| <b>Photocatalyst System</b>                                      | <b>Target pollutant</b> | <b>Number of cycles</b> | <b>Stability</b> | <b>References</b> |
|------------------------------------------------------------------|-------------------------|-------------------------|------------------|-------------------|
| N-TiO <sub>2</sub> /g-C <sub>3</sub> N <sub>4</sub>              | RhB                     | 5                       | 82.3% retained   | [2]               |
| Bare Ag <sub>3</sub> PO <sub>4</sub>                             | MB/RhB                  | 6                       | 50% retained     | [3]               |
| Cu-MOF                                                           | Reactive Blue           | 5                       | 83.3% retained   | [4]               |
| TPP/ AgBr                                                        | Rhb                     | 3                       | 80% retained     | [5]               |
| CuO-NiO                                                          | cefixime                | 5                       | 78% retained     | [6]               |
| BaTiO <sub>3</sub> (T-Ba)                                        | ciprofloxacin           | 5                       | 47% retained     | [7]               |
| CdS/PANI/MWCNTs                                                  | SBX                     | 5                       | 84.6% retained   | [8]               |
| Bi <sub>2</sub> WO <sub>6</sub> /g-C <sub>3</sub> N <sub>4</sub> | TC                      | 5                       | 85.49% retained  | This work         |

**Table S8.** Chemical formulas and main fragments (m/z) of intermediate products.

| ID | m/z   | Chemical Formula        | Proposed Structure                                                                    |
|----|-------|-------------------------|---------------------------------------------------------------------------------------|
| A  | 476.4 | $C_{22}H_{24}O_{10}N_2$ | 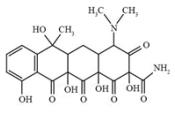   |
| B  | 350.3 | $C_{17}H_{20}O_7N$      |    |
| C  | 284.3 | $C_{15}H_{24}O_5$       |    |
| D  | 416.4 | $C_{20}H_{20}O_8N_2$    |   |
| E  | 318.3 | $C_{16}H_{14}O_7$       |  |
| F  | 218.2 | $C_{12}H_{10}O_4$       |  |
| G  | 122.1 | $C_7H_6O_2$             |  |
| H  | 166.2 | $C_9H_{10}O_3$          |  |

## References

- [1] Y. Zhou, Y. Zhang, M. Lin, J. Long, Z. Zhang, H. Lin, J.C. Wu, X. Wang, Monolayered  $\text{Bi}_2\text{WO}_6$  nanosheets mimicking heterojunction interface with open surfaces for photocatalysis, *Nat Commun* 6 (2015) 8340. <https://10.1038/ncomms9340>
- [2] R. Liu, M. Li, J. Chen, Y. Yin, W. Zhao, Z. Gong, H. Jin, Z. Liu, Enhanced photocatalytic degradation of tetracycline by magnetically separable g- $\text{C}_3\text{N}_4$ -doped magnetite@titanium dioxide heterostructured photocatalyst, *Water* 16 (2024) 1372. <https://doi.org/10.3390/w16101372>
- [3] P. Kavya, S. Priya, K. Pradeesh, K. Sandeep, K. P. Saranya, V. L. Thomas, M. Shanthil, Thin silica shell on  $\text{Ag}_3\text{PO}_4$  nanoparticles augments stability and photocatalytic reusability, *RSC Adv* , 13 (2023) 30643–30648. <https://doi.org/10.1039/D3RA05023H>
- [4] Z.A. Suliman, A.A. Ibrahim, C.A. Mecha, M.N. Chollom, Photocatalytic degradation and antibacterial efficacy of novel synthesized green Cu–Fe metal organic framework derived from *Acacia nilotica* extract, *Discover Chemistry* 2 (2025) 219. <https://doi.org/10.1007/s44371-025-00297-7>
- [5] Z. Song, H. Ma, J. Lu, G. Huang, Q. Gao, C. Xiao, Enhanced TPP/AgBr photocatalysis with Z-scheme heterojunctions for degradation of RhB, *ChemistrySelect* , 10 (2025) 33. <https://doi.org/10.1002/slct.202503075>
- [6] Z. Ur Rahman, U. Shah, A. Alam, Z. Shah, K. Shaheen, S. Bahadar Khan, S. Ali Khan, Photocatalytic degradation of cefixime using CuO–NiO nanocomposite photocatalyst, *Inorg. Chem. Commun.* , 148 (2023)

110312.<https://doi.org/10.1016/j.inoche.2022.110312>

[7] S. Sezer, P. Demircivi, N. Erdol Aydin, G. Nasun Saygili, Photocatalytic degradation of ciprofloxacin using tannin-doped BaTiO<sub>3</sub> catalyst, J. Photochem. Photobiol. A: Chem., 451 (2024)

115604.<https://doi.org/10.1016/j.jphotochem.2024.115468>

[8] Y. Jia, Y. Zhang, X. Zhang, J. Cheng, Y. Xie, Y. Zhang, X. Yin, F. Song, H. Cui, Novel CdS/PANI/MWCNTs photocatalysts for photocatalytic degradation of xanthate in wastewater, Sep. Purif. Technol., 309 (2023)

122992.<https://doi.org/10.1016/j.seppur.2022.123022>
